# Supplementary material
Source: PubMed Central journal article supplement (PMC3057927)
Supplement: NIHMS247139-supplement-1.pdf [file NIHMS247139-supplement-1.pdf]

**Supplementary Table 1- qPCR primers for wild-type p53, LSL-K-ras<sup>G12D</sup>, Chromosome 11 and GAPDH**

| Allele                    | Forward                         | Reverse                     |
|---------------------------|---------------------------------|-----------------------------|
| Wild-type p53 intron      | 5'-CATCCAGGCGGGAAATAGAG         | 5'-TGCTAAGCAAGTGTGGGCC      |
| (deleted in p53 null)     | Probe: 5'-6FAM-CGCTGAGTCCGGTTC  |                             |
| LSL-K-ras <sup>G12D</sup> | 5'-CCATGGCTTGAGTAAGTCTGC        | 5'-AGTACGCTATACCCTGTGGACACA |
|                           | probe, 5'-6FAM-TCGACAAGCTCATGCG |                             |

| Gene or region  | Forward                 | Reverse                 |
|-----------------|-------------------------|-------------------------|
| p53 (69.395 Mb) | 5'-CCAAGAAAAGCCTGAAGCAC | 5'-AAGAAACCGGAAATGCTCCT |
| p53 (69.399 Mb) | 5'-CCACAGGGCTGAGCTCTTAC | 5'-TTTTTGAGATTTGGCCTTGG |
| p53 (69.403 Mb) | 5'-TCACCCTCAAGGTACCAAGG | 5'-ATGCGAGAGACAGAGGCAAT |
| Ch 11, 17Mb     | 5'-CCTTGCTTTTGAAGCCACTC | 5'-GCCAGGATGGTCTCCACTTA |
| Ch 11, 29Mb     | 5'-CCAGAGACATTCCCCAGTGT | 5'-CCTGGACAGTACCCTGCCTA |
| Ch 11, 41Mb     | 5'-TGGCTGTTTGATGAGCTGTC | 5'-AGAGGAATGGGAGAGGCAAT |
| Ch 11, 55Mb     | 5'-AAGGCTAGCCAAACAAAGCA | 5'-CATGATCCCAGGAGCTTCAT |
| Ch 11, 82Mb     | 5'-GTCGTTTGTCTTTCGGGTGT | 5'-GCACAAGTGGATGAGCAAGA |
| Ch 11, 94Mb     | 5'-GGCGGTTAGAACTGCTTGAC | 5'-GTTCACTTCCAGCTGCCTTC |
| Ch 11, 106Mb    | 5'-CAGGTTTCCAAGCCTACCAT | 5'-GTGGGCAAGTGCCATTAGTT |
| Ch 11, 116Mb    | 5'-GAAGGATTCTGGGGGAAGAG | 5'-ATGCAGTTCCAACCTTGACC |
| GAPDH           | 5'-CAAGAAACAGGGGAGCTGAG | 5'-TCTCCACACCTATGGTGCAA |
